# Supplementary material
Source: publisher site journal article supplement (https://www.dovepress.com/article/286149)
Supplement: Supplementary file 1 [file get_supplementary_file.php]

**Supplementary Table 1. ICD-10 diagnostic code**

| **Diagnosis** | **ICD-10 code** |
| --- | --- |
| Chronic obstructive pulmonary disease | J42–J44 (except for J430) |
| Lung cancer | C33–C39 |
| Asthma | J45, J46 |
| Interstitial lung disease | J84 |
| Diabetes | E10–E14 |
| Hypertension | I10 |
| Heart failure | I11, I50 |
| Chronic kidney disease | N17–N19 |
| Chronic liver disease | K70–K76 |
| Pneumonia | J10–J18 |

**Supplementary Table 2.** Risk of pneumonia according to the ICS type and dose

|  | Univariate analysis | | Multivariate analysis | |
| --- | --- | --- | --- | --- |
| **Variables** | Hazard ratio | *P* value | Hazard ratio | *P* value |
| **Non-ICS users** | 1.00 |  | 1.00 |  |
| **ICS users** | 1.43 (1.38–1.48) | <0.0001 | 1.62 (1.54–1.70) | <0.0001 |
| **ICS cumulative**  **dose (**μg) |  |  |  |  |
| 1–15,000 | 1.17 (1.11–1.24) | <0.0001 | 1.35 (1.27–1.43) | <0.0001 |
| 15,000–30720 | 1.21 (1.14–1.28) | <0.0001 | 1.51 (1.42–1.60) | <0.0001 |
| 30,721–107,160 | 1.51 (1.44–1.59) | <0.0001 | 1.96 (1.85–2.09) | <0.0001 |
| > 107,610 | 1.79 (1.71–1.88) | <0.0001 | 2.03 (1.89–2.18) | <0.0001 |
| **ICS dose** |  |  |  |  |
| Low | 1.40 (1.34–1.46) | <0.0001 | 1.59 (1.51–1.68) | <0.0001 |
| Medium | 1.48 (1.42–1.55) | <0.0001 | 1.67 (1.59–1.77) | <0.0001 |
| High | 1.41 (1.29–1.56) | <0.0001 | 1.55 (1.40–1.71) | <0.0001 |
| **Type of ICS** |  |  |  |  |
| Fluticasone propionate | 1.54 (1.48–1.60) | <0.0001 | 1.79 (1.70–1.89) | <0.0001 |
| Budesonide | 1.24 (1.17–1.31) | <0.0001 | 1.44 (1.35–1.54) | <0.0001 |
| Beclomethasone | 1.29 (1.18–1.41) | <0.0001 | 1.52 (1.38–1.68) | <0.0001 |
| Ciclesonide | 1.16 (1.03–1.31) | 0.0126 | 1.29 (1.14–1.45) | <0.0001 |
| Fluticasone fluroate | 1.56 (1.41–1.74) | <0.0001 | 1.80 (1.61–2.01) | <0.0001 |

Hazard ratio in subgroup of ICS users was calculated in comparison to non-ICS users.
